# Supplementary material for: A diazene-bridged diruthenium complex with structural restraint defined by single meta-diphosphinobenzene
Source: Royal Society of Chemistry journal article supplement (doi:10.1039/d0dt04398b), 2021-01-01

## Electronic Supplementary Information

### A diazene-bridged diruthenium complex with structural restraint defined by single *meta*-diphosphinobenzene

Satoshi Suzuki, Tatsuro Toda and Shigeki Kuwata\*

*Department of Chemical Science and Engineering, School of Materials and Chemical  
Technology, Tokyo Institute of Technology  
2-12-1 E4-1 O-okayama, Meguro-ku, Tokyo 152-8552, Japan  
E-mail: skuwata@apc.titech.ac.jp*

#### Table of Contents

|                |                                                                                   |    |
|----------------|-----------------------------------------------------------------------------------|----|
| <b>Fig. S1</b> | <b><sup>1</sup>H NMR spectrum of 2</b>                                            | S2 |
| <b>Fig. S2</b> | <b><sup>1</sup>H NMR spectrum of 3</b>                                            | S3 |
| <b>Fig. S3</b> | <b><sup>31</sup>P{<sup>1</sup>H} NMR spectrum of 3</b>                            | S4 |
| <b>Fig. S4</b> | <b><sup>1</sup>H NMR spectrum of 3-<sup>15</sup>N<sub>2</sub></b>                 | S5 |
| <b>Fig. S5</b> | <b><sup>31</sup>P{<sup>1</sup>H} NMR spectrum of 3-<sup>15</sup>N<sub>2</sub></b> | S6 |
| <b>Fig. S6</b> | <b><sup>15</sup>N{<sup>1</sup>H} NMR spectrum of 3-<sup>15</sup>N<sub>2</sub></b> | S7 |
| <b>Fig. S7</b> | <b><sup>1</sup>H NMR spectrum of 4</b>                                            | S8 |
| <b>Fig. S8</b> | <b><sup>31</sup>P{<sup>1</sup>H} NMR spectrum of 4</b>                            | S9 |

Fig. S1  $^1\text{H}$  NMR spectrum of **2**.

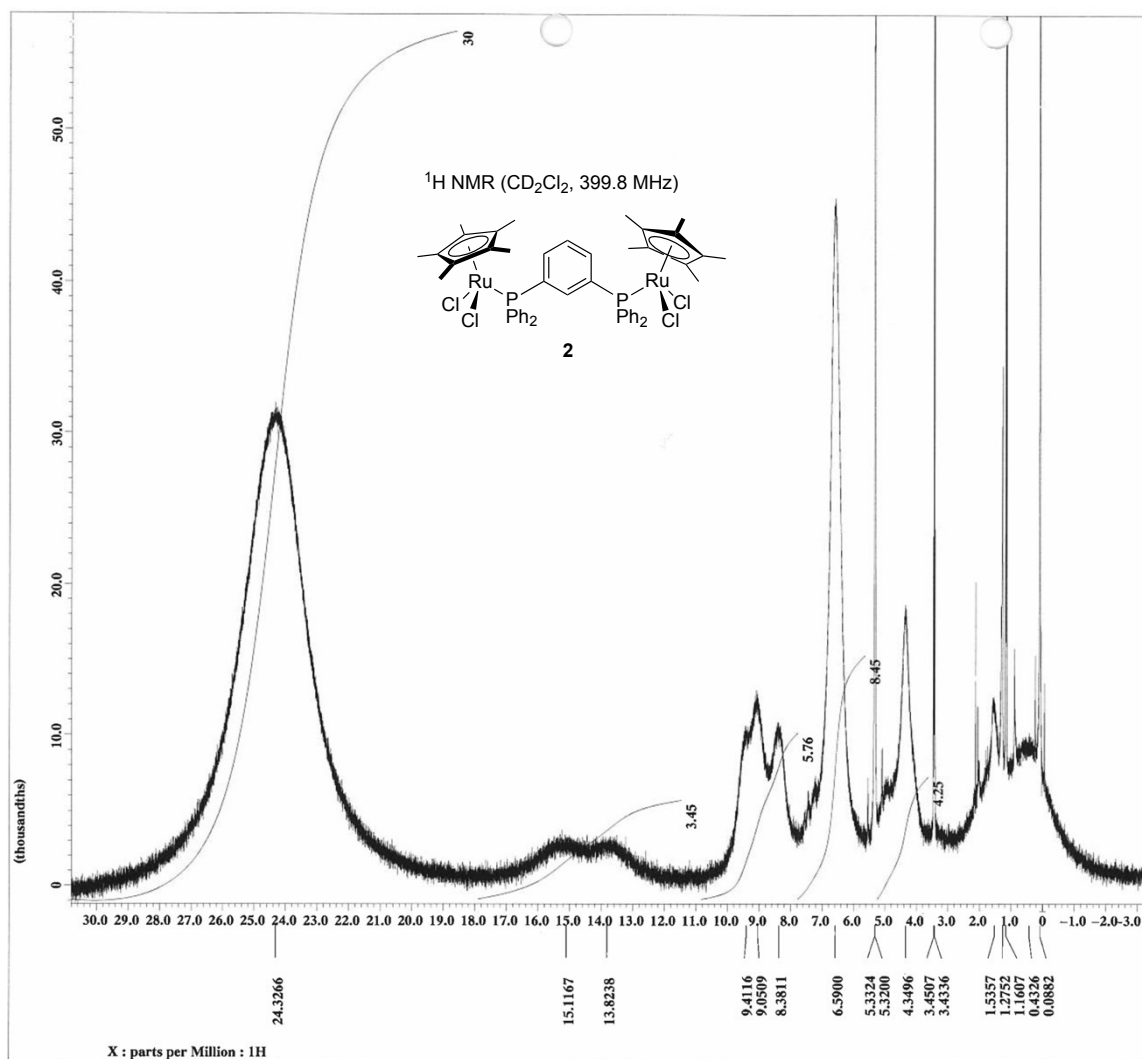

Fig. S2  $^1\text{H}$  NMR spectrum of **3**

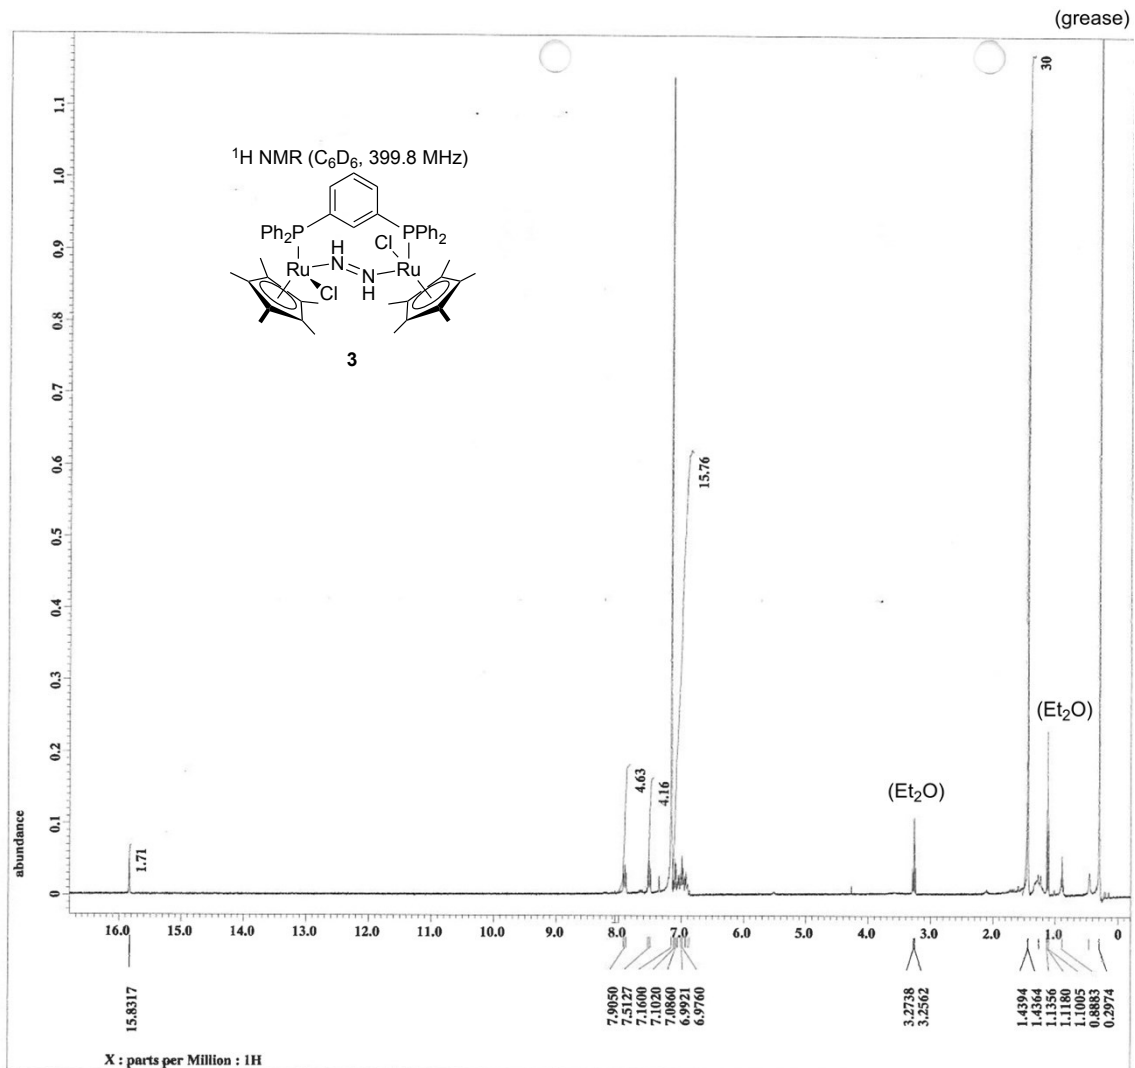

Fig. S3  $^{31}\text{P}\{^1\text{H}\}$  NMR spectrum of **3**

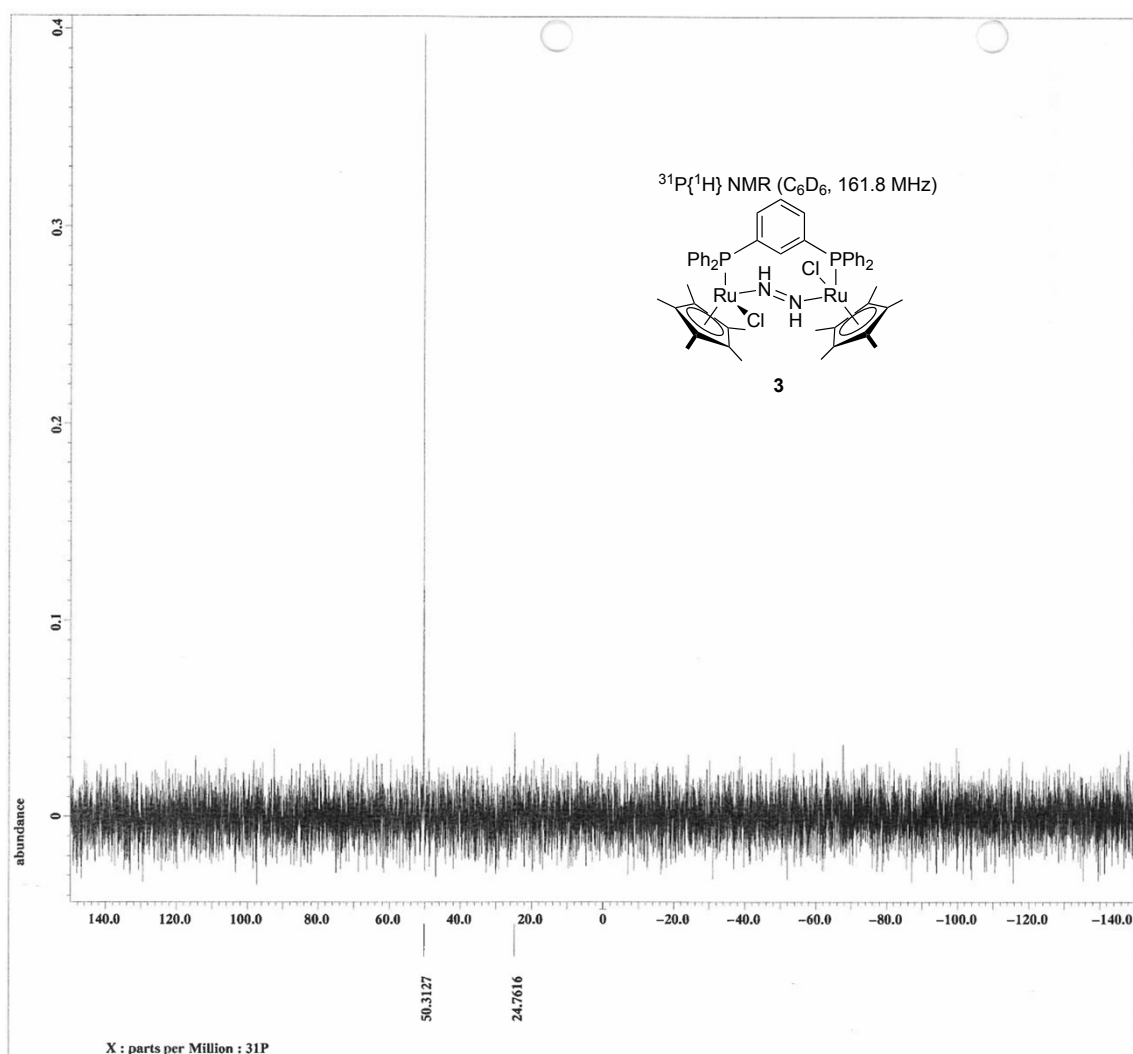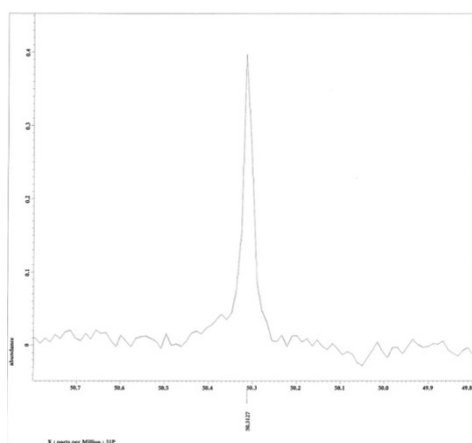



Fig. S5  $^{31}\text{P}\{^1\text{H}\}$  NMR spectrum of  $3\text{-}^{15}\text{N}_2$

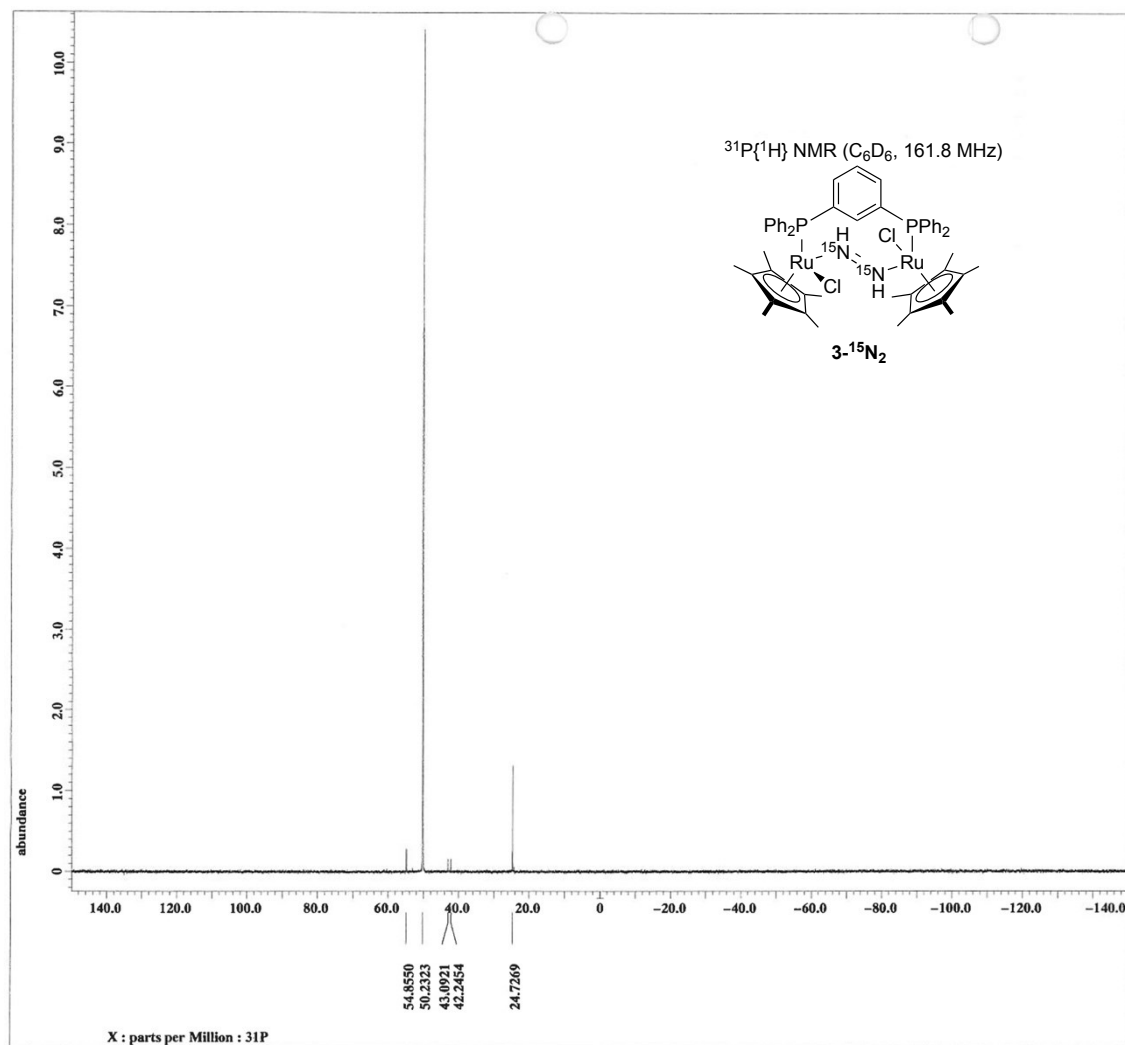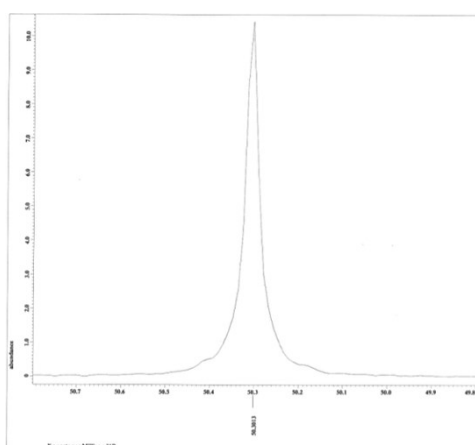

**Fig. S6**  $^{15}\text{N}\{^1\text{H}\}$  NMR spectrum of **3- $^{15}\text{N}_2$**

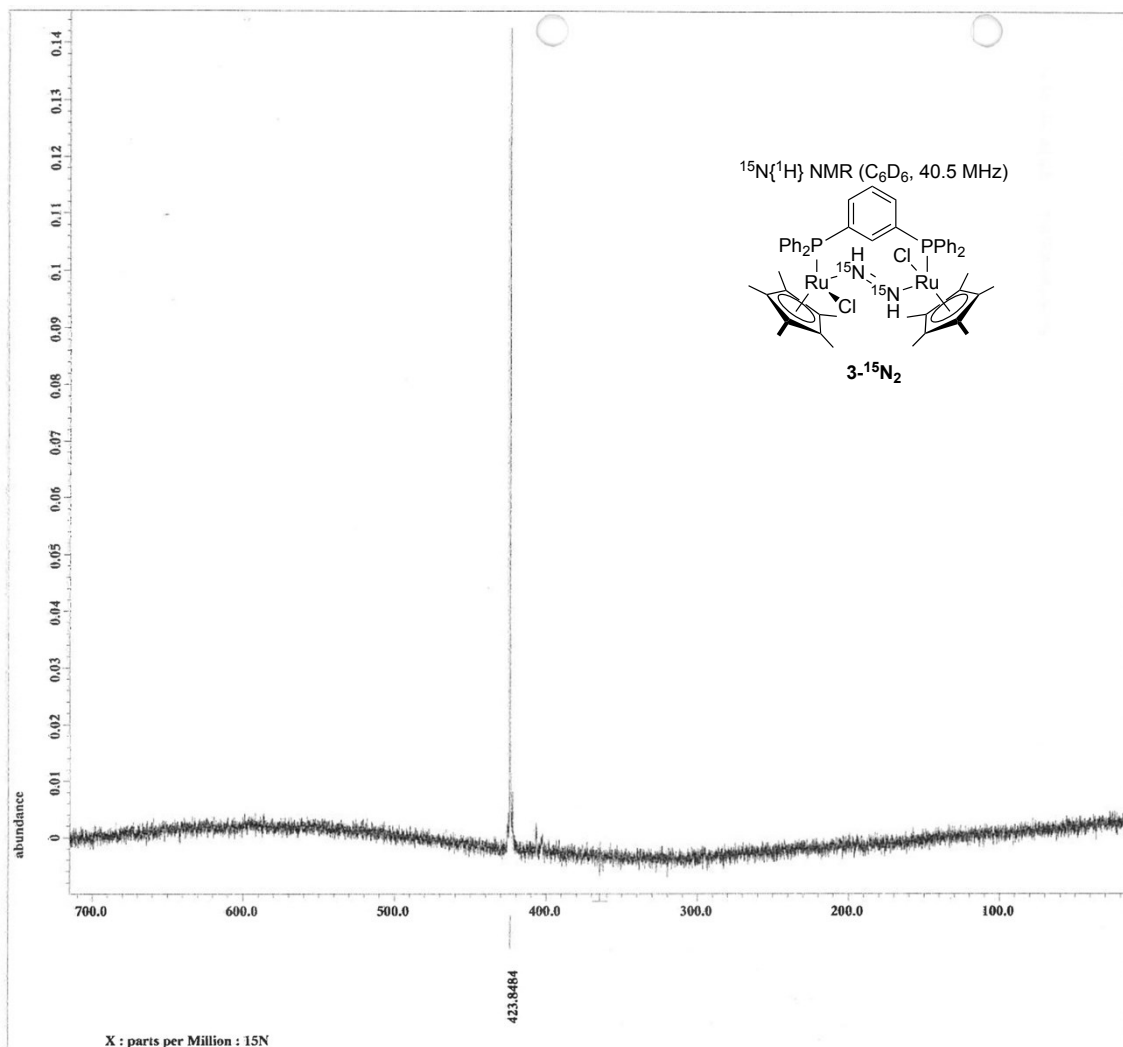

**Fig. S7**  $^1\text{H}$  NMR spectrum of **4**

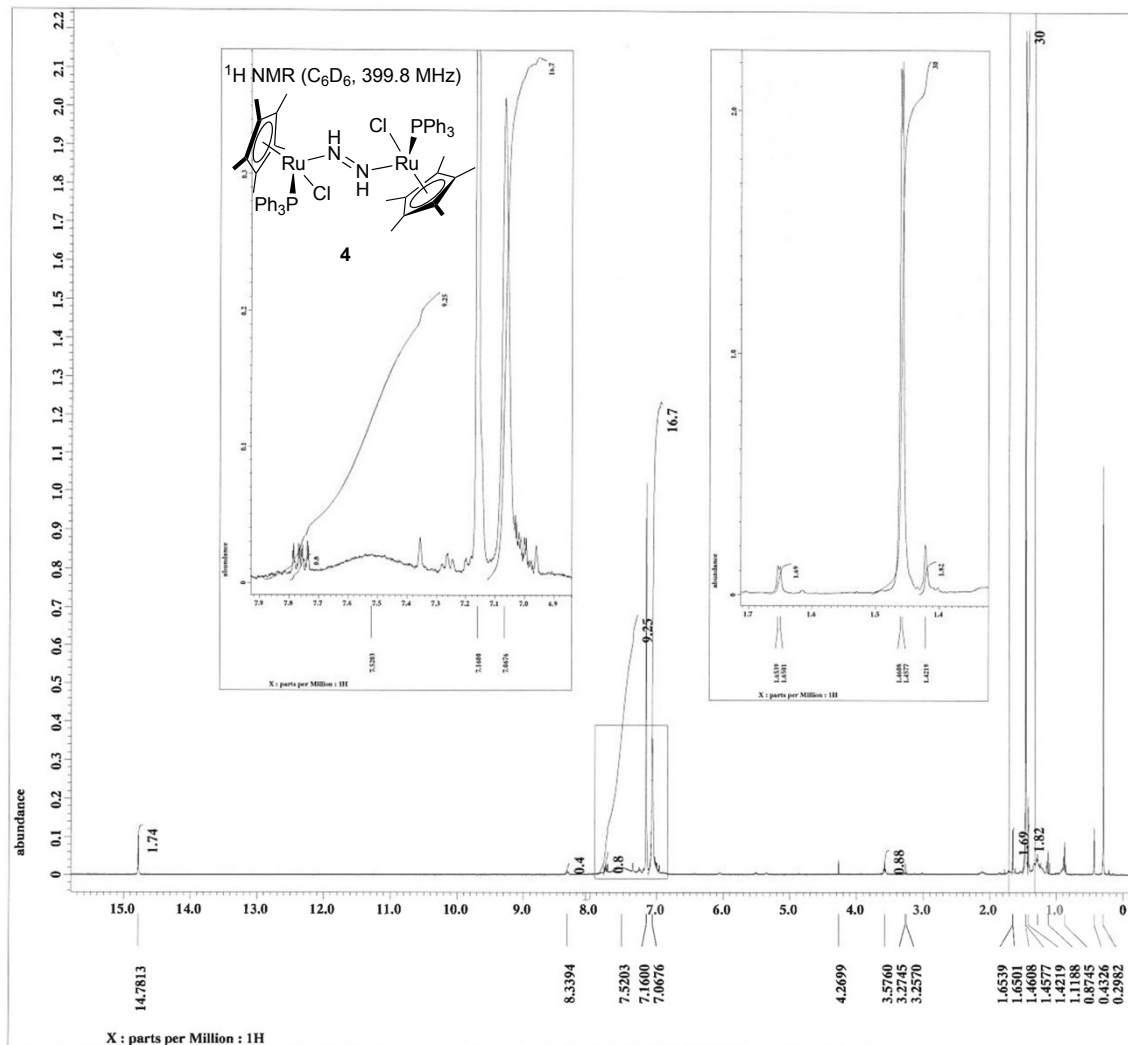



**Fig. S8**  $^{31}\text{P}\{^1\text{H}\}$  NMR spectrum of **4**

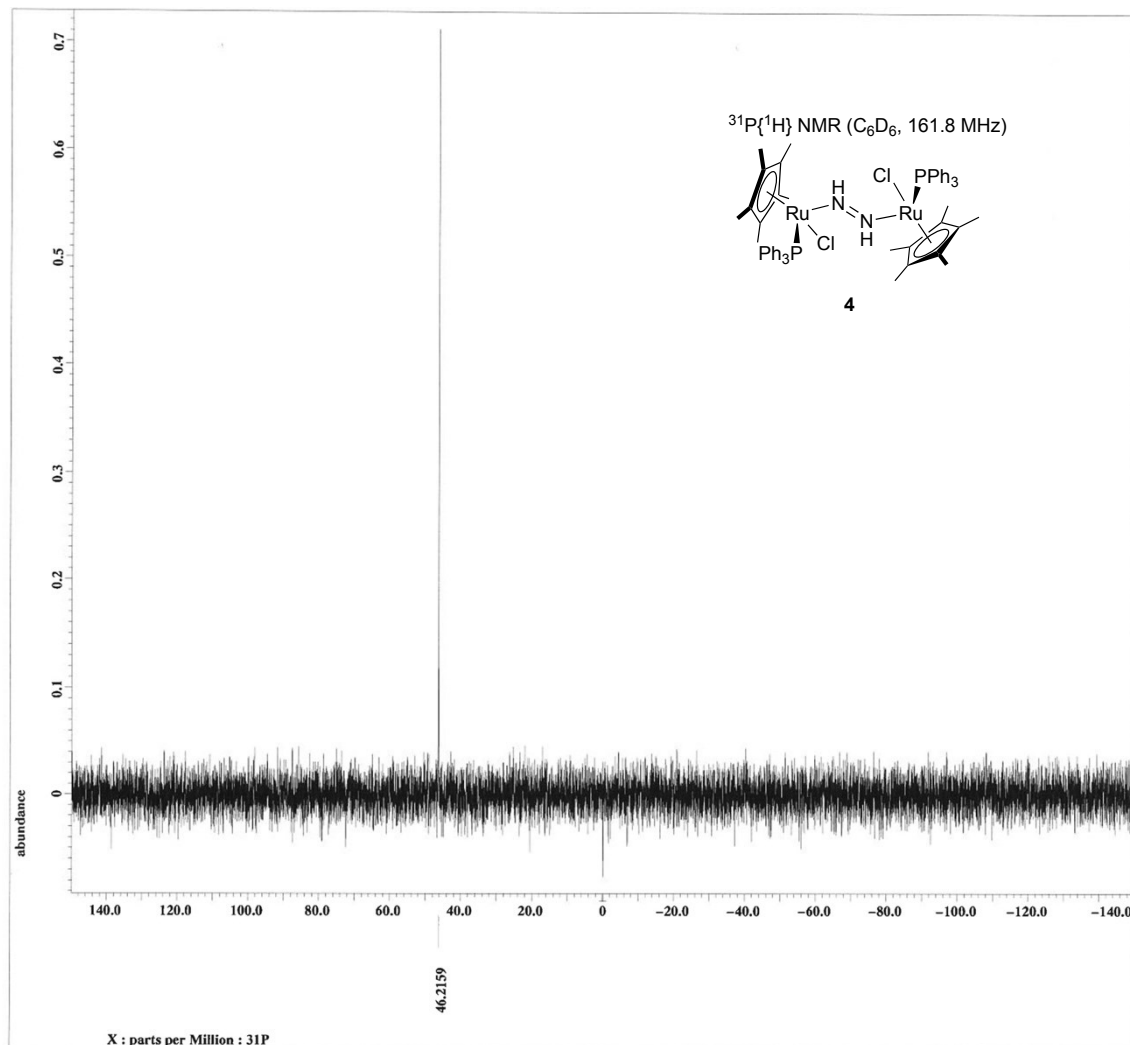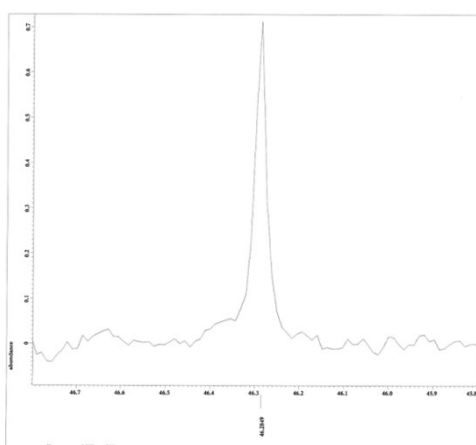

Supplement: d0dt04398b1.pdf [file d0dt04398b1.pdf]
